# Supplementary material for: Flow direction for analysis of the concentration of metals in the groundwater of the Western Amazon region (Ji-Paraná/RO), Brazil
Source: Research Square preprint supplement (doi:10.21203/rs.3.rs-2118615/v1), 2022-10-07
Supplement: Supplementary file 1 [file 0b778064cc46085da5b43dbe.pdf]

**Table 3:** P-values obtained through the Wilcoxon test for the averages in the hydrological periods analyzed

| <b>Elemento traço</b> | <b>p-valor - Fração Total</b> | <b>p-valor – Fração Dissolvida</b> |
|-----------------------|-------------------------------|------------------------------------|
| Al                    | 0,65                          | 0,08                               |
| As                    | <b>0,004</b>                  | <b>0,003</b>                       |
| Ba                    | 0,22                          | 0,12                               |
| Cd                    | <b>0,000001</b>               | <b>0,00006</b>                     |
| Co                    | 0,12                          | <b>0,02</b>                        |
| Cr                    | <b>0,025</b>                  | 0,21                               |
| Cu                    | 0,27                          | 0,35                               |
| Fe                    | <b>0,028</b>                  | <b>0,025</b>                       |
| Mn                    | 0,72                          | 0,36                               |
| Ni                    | <b>0,0079</b>                 | 0,13                               |
| Pb                    | <b>0,038</b>                  | 0,22                               |
| Sr                    | 0,20                          | 0,80                               |
| V                     | <b>0,000002</b>               | <b>0,00006</b>                     |
| Zn                    | <b>0,007</b>                  | 0,56                               |

Source: The author.
