# Supplementary material for: Flow direction for analysis of the concentration of metals in the groundwater of the Western Amazon region (Ji-Paraná/RO), Brazil
Source: Research Square preprint supplement (doi:10.21203/rs.3.rs-2118615/v1), 2022-10-07
Supplement: Supplementary file 2 [file 16b14a7b8b1846aee2783d4f.pdf]

**Equação 1:**

$$Sp = Cp - NE$$

Sp = Superfície Potenciométrica

Cp = Cota poço

NE = Nível Estático
