# Supplementary material for: Flow direction for analysis of the concentration of metals in the groundwater of the Western Amazon region (Ji-Paraná/RO), Brazil
Source: Research Square preprint supplement (doi:10.21203/rs.3.rs-2118615/v1), 2022-10-07
Supplement: Supplementary file 3 [file 3b7978fa4f046c2c86c9feb3.pdf]

**Table 2:** Minimum, average, maximum concentrations, lower than LDT and higher than VMP for the analyzed trace elements

| Parâmetro                | Valor | AA - Totais | AA - Dissolvidos | AB - Totais              | AB - Dissolvidos |
|--------------------------|-------|-------------|------------------|--------------------------|------------------|
| Al (ug.L <sup>-1</sup> ) | Mín.  | 22,7        | 3,22             | 16,2                     | 12,2             |
|                          | Médio | 162,9       | 166,2            | 126,7                    | 102,6            |
|                          | Máx.  | 680,8       | 693,4            | 506                      | 561,9            |
|                          | < LDT | 7,69%       | 6,67%            | 0,0%                     | 0,0%             |
|                          | >VMP  | 20%         | 20%              | 13,4%                    | 13,4%            |
| VMP PR n° 888/2021       |       |             |                  | 200 ug.L <sup>-1</sup>   |                  |
| VMP CONAMA n° 396/2008   |       |             |                  | 200 ug.L <sup>-1</sup>   |                  |
| As (ug.L <sup>-1</sup> ) | Mín.  | 0,73        | 0,16             | --                       | 0,35             |
|                          | Médio | 0,78        | 1,83             | --                       | 0,02             |
|                          | Máx.  | 2,56        | 5,42             | --                       | 0,35             |
|                          | < LDT | 53,8%       | 26,7%            | 100%                     | 93,4%            |
|                          | >VMP  | 0,0%        | 0,0%             | 0,0%                     | 0,0%             |
| VMP PR n° 888/2021       |       |             |                  | 100 ug.L <sup>-1</sup>   |                  |
| VMP CONAMA n° 396/2008   |       |             |                  | 100 ug.L <sup>-1</sup>   |                  |
| Ba (ug.L <sup>-1</sup> ) | Mín.  | 8,50        | 6,10             | 26,9                     | 2,70             |
|                          | Médio | 75,67       | 73,4             | 191,7                    | 182,3            |
|                          | Máx.  | 163,3       | 271,3            | 1.131                    | 1.217            |
|                          | < LDT | 0,0%        | 0,0%             | 0,0%                     | 0,0%             |
|                          | >VMP  | 0,0%        | 0,0%             | 6,67%                    | 6,67%            |
| VMP PR n° 888/2021       |       |             |                  | 700 ug.L <sup>-1</sup>   |                  |
| VMP CONAMA n° 396/2008   |       |             |                  | 700 ug.L <sup>-1</sup>   |                  |
| Cd (ug.L <sup>-1</sup> ) | Mín.  | 0,33        | 0,28             | --                       | --               |
|                          | Médio | 0,46        | 0,49             | --                       | --               |
|                          | Máx.  | 0,62        | 0,62             | --                       | --               |
|                          | < LDT | 0,0%        | 0,0%             | 100%                     | 100%             |
|                          | >VMP  | 0,0%        | 0,0%             | 0,0%                     | 0,0%             |
| VMP PR n° 888/2021       |       |             |                  | 3 ug.L <sup>-1</sup>     |                  |
| VMP CONAMA n° 396/2008   |       |             |                  | 5 ug.L <sup>-1</sup>     |                  |
| Co (ug.L <sup>-1</sup> ) | Mín.  | 0,15        | 0,64             | 1,48                     | 2,04             |
|                          | Médio | 1,44        | 1,27             | 0,64                     | 0,57             |
|                          | Máx.  | 5,56        | 4,12             | 3,28                     | 3,39             |
|                          | < LDT | 38,5%       | 46,7%            | 73,4%                    | 80%              |
|                          | >VMP  | --          | --               | --                       | --               |
| VMP PR n° 888/2021       |       |             |                  | Não estabelecido         |                  |
| VMP CONAMA n° 396/2008   |       |             |                  | Não estabelecido         |                  |
| Cr (ug.L <sup>-1</sup> ) | Mín.  | 0,10        | 0,06             | --                       | 1,90             |
|                          | Médio | 0,23        | 0,69             | --                       | 0,13             |
|                          | Máx.  | 2,39        | 7,03             | --                       | 1,90             |
|                          | < LDT | 69,2%       | 66,7%            | 100%                     | 93,4%            |
|                          | >VMP  | 0,0%        | 0,0%             | 0,0%                     | 0,0%             |
| VMP PR n° 888/2021       |       |             |                  | 50 ug.L <sup>-1</sup>    |                  |
| VMP CONAMA n° 396/2008   |       |             |                  | 50 ug.L <sup>-1</sup>    |                  |
| Cu (ug.L <sup>-1</sup> ) | Mín.  | 2,71        | 0,69             | 0,09                     | 1,48             |
|                          | Médio | 0,55        | 0,59             | 8,09                     | 6,96             |
|                          | Máx.  | 4,48        | 3,55             | 96,8                     | 84,4             |
|                          | < LDT | 84,6%       | 73,3%            | 66,7%                    | 73,4%            |
|                          | >VMP  | 0,0%        | 0,0%             | 0,0%                     | 0,0%             |
| VMP PR n° 888/2021       |       |             |                  | 2.000 ug.L <sup>-1</sup> |                  |
| VMP CONAMA n° 396/2008   |       |             |                  | 2.000 ug.L <sup>-1</sup> |                  |
| Fe (ug.L <sup>-1</sup> ) | Mín.  | 24,6        | 19,1             | 11,6                     | 18,9             |
|                          | Médio | 537,7       | 534,8            | 66,3                     | 81,3             |
|                          | Máx.  | 3.492       | 2.461            | 387,4                    | 903,6            |
|                          | < LDT | 7,69%       | 0,0%             | 20%                      | 46,7%            |
|                          | >VMP  | 6,67%*      | 6,67%*           | 0,0%                     | 0,0%             |
| VMP PR n° 888/2021*      |       |             |                  | 2.400 ug.L <sup>-1</sup> |                  |
| (1) CONAMA n° 396/2008   |       |             |                  | 300 ug.L <sup>-1</sup>   |                  |
| Mn (ug.L <sup>-1</sup> ) | Mín.  | 4,72        | 15,6             | 7,39                     | 5,96             |
|                          | Médio | 69,6        | 94,5             | 65,4                     | 59,7             |
|                          | Máx.  | 195         | 324,2            | 209,4                    | 261,2            |
|                          | < LDT | 0,0%        | 0,0%             | 0,0%                     | 0,0%             |
|                          | >VMP  | 0,0%        | 0,0%             | 0,0%                     | 0,0%             |
| VMP PR n° 888/2021       |       |             |                  | 400 ug.L <sup>-1</sup>   |                  |
| (1) CONAMA n° 396/2008   |       |             |                  | 100 ug.L <sup>-1</sup>   |                  |

|                          |       |       |       |                          |       |
|--------------------------|-------|-------|-------|--------------------------|-------|
|                          | Mín.  | 0,42  | 0,10  | 0,06                     | 0,043 |
|                          | Médio | 2,52  | 0,47  | 0,19                     | 0,91  |
| Ni (ug.L <sup>-1</sup> ) | Máx.  | 19    | 2,90  | 2,06                     | 3,01  |
|                          | < LDT | 30,8% | 66,7% | 73,4%                    | 6,67% |
|                          | >VMP  | 0,0%  | 0,0%  | 0,0%                     | 0,0%  |
| VMP PR n° 888/2021       |       |       |       | 70 ug.L <sup>-1</sup>    |       |
| (2) CONAMA n° 396/2008   |       |       |       | 20 ug.L <sup>-1</sup>    |       |
|                          | Mín.  | 0,66  | 0,28  | 0,08                     | 0,67  |
|                          | Médio | 2,81  | 4,39  | 0,65                     | 1,78  |
| Pb (ug.L <sup>-1</sup> ) | Máx.  | 13,22 | 18,9  | 6,89                     | 9,48  |
|                          | < LDT | 38,5% | 46,7% | 73,4%                    | 66,7% |
|                          | >VMP  | 6,67% | 13,4% | 0,0%                     | 0,0%  |
| VMP PR n° 888/2021       |       |       |       | 10 (ug.L <sup>-1</sup> ) |       |
| VMP CONAMA n° 396/2008   |       |       |       | 10 (ug.L <sup>-1</sup> ) |       |
|                          | Mín.  | 11,1  | 4,48  | 8,68                     | 2,86  |
|                          | Médio | 75,4  | 61,7  | 52,8                     | 56,9  |
| Sr (ug.L <sup>-1</sup> ) | Máx.  | 161,2 | 237,5 | 124,5                    | 149,9 |
|                          | < LDT | 0,0%  | 0,0%  | 0,0%                     | 0,0%  |
|                          | >VMP  | --    | --    | --                       | --    |
| VMP PR n° 888/2021       |       |       |       | Não estabelecido         |       |
| VMP CONAMA n° 396/2008   |       |       |       | Não estabelecido         |       |
|                          | Mín.  | --    | --    | 8,0                      | 6,92  |
|                          | Médio | --    | --    | 9,02                     | 8,16  |
| V (ug.L <sup>-1</sup> )  | Máx.  | --    | --    | 11,5                     | 11,5  |
|                          | < LDT | 100%  | 100%  | 0,0%                     | 0,0%  |
|                          | >VMP  | 0,0%  | 0,0%  | 0,0%                     | 0,0%  |
| VMP PR n° 888/2021       |       |       |       | Não estabelecido         |       |
| VMP CONAMA n° 396/2008   |       |       |       | 50 ug.L <sup>-1</sup>    |       |
|                          | Mín.  | 8,61  | 12,7  | 31,9                     | 11,2  |
|                          | Médio | 49,2  | 83,3  | 83,6                     | 109,5 |
| Zn (ug.L <sup>-1</sup> ) | Máx.  | 214,8 | 490,5 | 285,2                    | 364   |
|                          | < LDT | 7,69% | 0,0%  | 0,0%                     | 0,0%  |
|                          | >VMP  | 0,0%  | 0,0%  | 0,0%                     | 0,0%  |
| (1) PR n° 888/2021       |       |       |       | 5.000 ug.L <sup>-1</sup> |       |
| (1) CONAMA n° 396/2008   |       |       |       | 5.0 .L <sup>-1</sup>     |       |

(1) Organoleptic Standard; (2) Maximum concentration of substance in irrigation water in 20 years of irrigation (protection of plants and other organisms). Source: The author.
