# Supplementary material for: Flow direction for analysis of the concentration of metals in the groundwater of the Western Amazon region (Ji-Paraná/RO), Brazil
Source: Research Square preprint supplement (doi:10.21203/rs.3.rs-2118615/v1), 2022-10-07
Supplement: Supplementary file 4 [file a19e8e500de375adf2cb92da.pdf]

**Table 1** - Qualitative assessment of the degree of correlation between two variables

| <b>r</b>  | <b>A correlação é dita</b> |
|-----------|----------------------------|
| 0         | Nula                       |
| 0 – 0,3   | Fraca                      |
| 0,3 - 0,6 | Regular                    |
| 0,6 - 0,9 | Forte                      |
| 0,9 - 1   | Muito forte                |
| 1         | Plena ou perfeita          |

Fonte: Callegari-Jacques, 2003.
